# Supplementary material for: Microfluidic manipulation by spiral hollow-fibre actuators
Source: PubMed Central journal article supplement (PMC8921237; doi:10.1038/s41467-022-29088-9), 2022-03-14
Supplement: 41467_2022_29088_MOESM1_ESM.pdf [file 41467_2022_29088_MOESM1_ESM.pdf]

1 Supplementary information for

2 **Microfluidic Manipulation by Spiral Hollow-Fiber Actuators**

3  
4 Sitong Li<sup>1</sup>, Rui Zhang<sup>2</sup>, Guanghao Zhang<sup>1</sup>, Luyizheng Shuai<sup>1</sup>, Wang Chang<sup>1</sup>, Xiaoyu  
5 Hu<sup>1</sup>, Min Zou<sup>1</sup>, Xiang Zhou<sup>1</sup>, Baigang An<sup>3</sup>, Dong Qian<sup>2</sup>, Zunfeng Liu<sup>1\*</sup>

6  
7 <sup>1</sup>State Key Laboratory of Medicinal Chemical Biology, College of Chemistry and  
8 College of Pharmacy, Key Laboratory of Functional Polymer Materials, Frontiers  
9 Science Center for New Organic Matter, Nankai University, Tianjin 300071, China

10 <sup>2</sup>Department of Mechanical Engineering, University of Texas at Dallas, Richardson,  
11 TX 75080, USA

12 <sup>3</sup>School of Chemical Engineering, University of Science and Technology Liaoning,  
13 Anshan 114051, China

14 E-mail: [liuzunfeng@nankai.edu.cn](mailto:liuzunfeng@nankai.edu.cn)

15  
16  
17  
18 **This PDF file includes:**

19  
20 Supplementary Note 1. Methods (Pages S2–S3)

21 Supplementary Note 2. Thermomechanical modeling (Pages S3–S7)

22 Supplementary Note 3. Optimum hollow fiber geometry analysis (Pages S7–S8)

23 Supplementary Figures 1 to 12 (Pages S9–S15)

24 Supplementary Tables 1 to 3 (Pages S16–17)

25 References (Page S18)

26

## 27 **Supplementary Note 1. Methods**

### 28 *1.1 Characterizations*

29 Linear coefficients of thermal expansion (CTE) of PEHF were measured from 0  
30 to 100 °C at a heating rate of 3 °C min<sup>-1</sup> using a thermomechanical analyzer (TMA,  
31 Q400 system, TA instruments). Because the thermal expansion of employed  
32 polyethylene hollow fibre is anisotropic<sup>1</sup>, the axial and the radial coefficients of  
33 thermal expansion were tested individually. For each experiment, three heating scans  
34 and two cooling scans were conducted. The linear CTE along each direction was  
35 calculated based on the thermomechanical analysis results.

36 Two-dimensional wide-angle X-ray scattering (2D WAXS) experiments were  
37 performed at a sample-to-detector distance of 100 mm using CuK $\alpha$  radiation ( $\lambda = 1.54$   
38 Å) by deploying a D8 Discover system (Bruker, Germany) equipped with a 2D  
39 HI-Star detector and a 1.6 kW generator. Parallel PEHF were assembled, using a  
40 video microscope to ensure that the X-ray beam irradiated the centers of the fibres.  
41 The image acquisition time was 600 s. One-dimensional wide-angle X-ray scattering  
42 (1D WAXS) experiments were performed using CuK $\alpha$  radiation and a 2 $\theta$  scanning  
43 rate of 5° min<sup>-1</sup> on a Rigaku Smart Lab system (Japan) equipped with a 3.0 kW  
44 generator.

### 45 *1.2 Calculation of the degree of orientation of crystals using WAXS analysis*

46 Despite inserting twists into a polymer fibre, the highly oriented semicrystalline  
47 form is also the key to provide a fibre the actuation capability. The Herman's  
48 orientation parameter ( $f$ ) is employed to represent the polymer chain alignment of the  
49 fibre, where  $f = 1$  means that the polymer chains orient along the fibre axis  
50 direction completely;  $f = -0.5$  means that the polymer chains orient vertically to  
51 the fibre axis direction completely. For a non-oriented sample,  $f$  equals to 0.

52 The Herman's orientation parameters ( $f_a$ ,  $f_b$ , and  $f_c$ ) for the a-axis, b-axis, and  
53 c-axis, for a unit cell of polyethylene crystallite with orthorhombic symmetry, were  
54 calculated as 0.12, -0.30, and 0.18, respectively, according to the literatures.<sup>2-3</sup> These  
55 values provide the evidences that the fibres are in highly oriented semicrystalline

56 form.

57 The calculation details are as follows.

58 The Herman's orientation parameter ( $f$ ) is defined as:

$$59 \quad f = \frac{3\langle \cos^2 \Phi \rangle - 1}{2} \quad (1.1),$$

60 where  $\langle \cos^2 \Phi \rangle$  is an orientation factor defined as:

$$61 \quad \langle \cos^2 \Phi \rangle = \frac{\int_0^\pi I_\Phi \cos^2 \Phi \sin \Phi d\Phi}{\int_0^\pi I_\Phi \sin \Phi d\Phi} \quad (1.2),$$

62 where  $I_\Phi$  represents the diffraction intensity. The azimuthal curve obtained by  
63 integration of diffraction intensity in the 2D WAXS pattern is used in Eq. (1.2) to  
64 calculate  $\cos^2 \Phi$  by the numerical integration process. Then the values of  $\cos^2 \Phi$   
65 are used in Eq. (1.1) to calculate the orientation function value  $f$  of the semicrystalline  
66 polymers.

67 For polyethylene with orthorhombic symmetry of the unit cell, the a-axis ( $f_a$ ) and  
68 b-axis ( $f_b$ ) orientation parameters were calculated from the intense reflections of (200)  
69 and (020) planes based on the relation:

$$70 \quad \langle \cos^2 \Phi_{110} \rangle = 0.692\langle \cos^2 \Phi_{020} \rangle + 0.308\langle \cos^2 \Phi_{200} \rangle \quad (1.3),$$

71 where  $\langle \cos^2 \Phi_{110} \rangle$  and  $\langle \cos^2 \Phi_{200} \rangle$  are obtained from the azimuthal intensity  
72 measurements on the (110) and (200) reflections, respectively. The parameter  $f_c$  is  
73 estimated based on the orthogonal symmetry relationship:  $f_a + f_b + f_c = 0$ .<sup>4</sup>

74 The detailed calculations for  $f_a$ ,  $f_b$ , and  $f_c$  are as follows. First, an azimuthal  
75 curve was obtained by integration of diffraction intensity in the 2D WAXS pattern  
76 over the azimuthal angle using the software of the GADDS (general area detector  
77 diffraction system) for diffraction angles ( $2\theta_d$ ) of 21.6° (110 plane) and 24° (200  
78 plane), as shown in Supplementary Fig. 1c. Two identical peaks were observed in the  
79 azimuthal curve (Supplementary Fig.1d) because of the symmetric diffraction pattern  
80 in 2D WAXS. The  $f_a$ ,  $f_b$ , and  $f_c$  of the PEHF are respectively 0.12, -0.30, and 0.18,  
81 which indicate that the fibres are in highly oriented semicrystalline form.

82

## 83 **Supplementary Note 2. Thermomechanical modeling of hollow fibre actuator**

### 84 *1.1 Transient heat conduction analysis*

85 The temperature change of the hollow fibre actuator is contributed by the forced  
86 convection of the internal flowing water as well as the natural convection of the  
87 ambient (external) air. To study this transient heat conduction problem, we establish a  
88 two-step model. First, we model the radial heat conduction at an arbitrary  
89 cross-section of the hollow fibre actuator. Second, we build a simple axial heat  
90 conduction model based on the assumption that heat conduction rate along the hollow  
91 fibre axis is much slower compared to the water flow rate and the rate of heat  
92 conduction in the radial direction. With this two-step model, we determine the hollow  
93 fibre actuator temperature as a function of radial and axial coordinates and time.

94 The DSC results showed that there was no observable phase transition in the  
95 PEHF for the investigated temperature range (Supplementary Fig. 1b), we assume that  
96 there is no contribution of the phase transition to the volume change and the heat  
97 transfer contributed to the volume expansion.

98 First, the governing equation of the transient heat conduction in radial direction  
99 at an arbitrary cross-section of the hollow fibre is given by

$$100 \quad \frac{\partial^2 \theta}{\partial r^2} + \frac{1}{r} \frac{\partial \theta}{\partial r} = \frac{1}{\alpha} \frac{\partial \theta}{\partial t} \quad \text{in } R_i \leq r \leq R_o, \quad (2.1)$$

101 where  $\theta(r, t)$  is the temperature,  $R_i$  and  $R_o$  are the inner and outer radius of the hollow  
102 fibre, respectively. Thermal diffusivity  $\alpha$  is defined by

$$103 \quad \alpha = \frac{k}{\rho c_p}, \quad (2.2)$$

104 in which  $k$  is the thermal conductivity,  $\rho$  is the mass density,  $c_p$  is the specific heat  
105 capacity<sup>5-6</sup>. For PE, we have  $k = 0.33 \text{ W (m}\cdot\text{K)}^{-1}$ ,<sup>7</sup>  $\rho = 920 \text{ kg m}^{-3}$ ,<sup>8</sup>  $c_p = 2300 \text{ J}$   
106  $(\text{kg}\cdot\text{K})^{-1}$ .<sup>8</sup>

107 The convective boundary conditions at the interior and exterior surfaces of the  
108 hollow fibre are given by

109 
$$k \frac{\partial \theta}{\partial r} \Big|_{r=R_i} = h_w (\theta|_{r=R_i} - \theta_w), \quad (2.3)$$

110 
$$-k \frac{\partial \theta}{\partial r} \Big|_{r=R_o} = h_a (\theta|_{r=R_o} - \theta_a), \quad (2.4)$$

111 where  $h_w$  and  $h_a$  are the heat transfer coefficients of water and air, respectively.

112 Similarly,  $\theta_w$  and  $\theta_a$  are respectively the temperatures of water and air. The heat  
 113 transfer coefficient of water depends on many factors such as hollow fibre internal  
 114 geometry, surface roughness, water physical properties as well as the flow state  
 115 (laminar or turbulent), *etc.* In this work, we employ  $h_w = 2000 \text{ W (m}^2\cdot\text{K)}^{-1}$ , which  
 116 provides the best fit of theoretical predictions to the experimental measurements.

117 The initial condition is

118 
$$\theta(t=0) = \theta_0, \quad (2.5)$$

119 where  $\theta_0$  is the initial temperature of the hollow fibre actuator.

120 The above 1D radial transient heat conduction equations can be solved either  
 121 analytically using methods of separation of variables and superposition, which are  
 122 well documented in ref. 10, or using numerical methods such as finite difference or  
 123 finite element. In this work, we solved this 1D partial differential equation (PDE)  
 124 using the PDE solver provided by MATLAB\*.

125 Next, we assume that the axial heat conduction rate is much lower compared to  
 126 the water flow rate. As such, the heat transfer in the axial direction is mainly  
 127 contributed by the flowing water and the radial conduction. Therefore, by substituting  
 128 water temperature as a function of axial coordinate and time, i.e.  $\theta_w = \theta_w(x, t)$ , in  
 129 which  $x$  is the axial coordinate, into the above radial heat conduction equations, we  
 130 can solve the hollow fibre temperature distribution in the axial direction.

131 Water temperature  $\theta_w(x, t)$  depends on a few factors, such as initial water  
 132 temperature, water flow rate, heat loss due to transfer to hollow fibre actuator and

---

\*<https://www.mathworks.com/help/matlab/math/partial-differential-equations.html>

133 eventually to the ambient air, *etc.* For simplicity, we assume that the heat loss is  
 134 relatively low when the flow rate is high. Therefore, we can write the water  
 135 temperature as

$$136 \quad \theta_w(x, t) = \theta_{w0} H(\nu t - x), \quad (2.6)$$

137 where  $\theta_{w0}$  is the initial water temperature,  $\nu$  is the water flowrate and  $H(\cdot)$  is the  
 138 Heaviside step function.

139

## 140 2.2 Torsional actuation modeling

141 Torsional actuation mechanism of the twisted polymer fibres was studied in ref.  
 142 10 and 11. The hollow fibre length  $l$ , the hollow fibre outer diameter  $d$ , and the  
 143 helically oriented polymer chain length  $\lambda$  are related through

$$144 \quad \lambda^2 = [(\pi d T)^2 + 1] l^2, \quad (2.7)$$

145 where  $T$  is the twist density.

146 Upon heating, polymer chains will expand in the radial direction and contract in  
 147 the axial direction, which can be accommodated by the changes in the hollow fibre  
 148 length, the diameter and the twist density. In ref. 10, the change of hollow fibre length  
 149 is considered small and the following equation for untwisting can be obtained by

$$150 \quad \Delta T = \left( \frac{\Delta \lambda}{\lambda} \frac{1}{\cos^2 \alpha_f} - \frac{\Delta d}{d} \right) T, \quad (2.8)$$

151 where bias angle  $\alpha_f = \tan^{-1}(\pi d T)$ <sup>12</sup>.

152 Ref. 11 further assumed that  $\lambda$  is also constant. Therefore, the untwist  $\Delta T$  is  
 153 linearly proportional to the change in the hollow fibre diameter, i.e.

$$154 \quad \Delta T = -\frac{\Delta d}{d} T, \quad (2.9)$$

155 In this work, we employ Eq. (2.8) for torsional actuation modeling. It can be  
 156 rewritten as

$$157 \quad \Delta T = \left( \alpha_\lambda \frac{1}{\cos^2 \alpha_f} - \alpha_d \right) \Delta \theta \cdot T, \quad (2.10)$$

158 where  $\alpha_\lambda$  and  $\alpha_d$  are the coefficients of thermal expansion of polymer chain in the  
 159 axial direction and that of the hollow fibre in the radial direction, respectively. The  $\Delta\theta$   
 160 is the temperature change obtained from the previous transient heat conduction  
 161 analysis. In this work, the average exterior hollow fibre temperature change is  
 162 employed as the actuation temperature  $\Delta\theta$ . Axial and radial coefficients of thermal  
 163 expansion of PEHFs were employed as  $\alpha_\lambda = -(5.3 \pm 0.4) \times 10^{-4} \text{ K}^{-1}$  and  
 164  $\alpha_d = (5.2 \pm 0.7) \times 10^{-4} \text{ K}^{-1}$ , which were obtained from thermomechanical analysis  
 165 (TMA).

166

### 167 *2.3 Tensile actuation modeling*

168 The tensile actuation mechanism of the twisted, mandrel-coiled polymer fibre is  
 169 well documented in ref. 10, which is adopted in this work. The equation for tensile  
 170 actuation is

$$171 \quad \frac{\Delta L}{L} = \frac{l^2}{NL} \Delta T \quad , \quad (2.11)$$

172 where  $L$  is the coil length,  $l$  is the twisted hollow fibre length,  $N$  is the number of coil  
 173 turns and  $\Delta T$  is the amount of untwisting that can be obtained from Eq. (2.10).

174

### 175 **Supplementary Note 3. The analysis for the optimum hollow fibre geometry**

176 To provide an estimation of the optimum configuration of the hollow fibre, we  
 177 assume steady heat solution and constant temperature due to the small thickness of the  
 178 hollow fibre. Based on the linear elastic solution for a thin-walled hollow fibre under  
 179 pure torsion<sup>13</sup>, the generated torque  $M$  is related to the twist through

$$180 \quad M = 2\pi GJT, \quad (3.1)$$

181 in which  $G$  is shear modulus,  $J$  is the polar second moment of area. For the hollow  
 182 fibre section  $J = \frac{\pi}{2}(r_o^4 - r_i^4)$  where  $r_i$  and  $r_o$  are the inner and outer radius of the  
 183 hollow fibre, respectively.

184 Applying Eq. (3.1) to the hollow fibre configurations before and after the

185 torsional actuation provides the torque release  $\Delta M$ :

186 
$$\Delta M = \pi G A_0 (r_i^2 + r_o^2) [(I + \alpha_d \Delta \theta)^4 (T + \Delta T) - T], \quad (3.2)$$

187 in which  $A_0$  is the cross-section area of the hollow fibre.

188 We now introduce a simplified version of torsional actuation based on Ref. 10 :

189 
$$\Delta T = \left( \frac{d_0}{d} - 1 \right) T. \quad (3.3)$$

190 Substituting Eq. (3.3) into (3.2) gives

191 
$$\Delta M = \pi G A_0 (r_i^2 + r_o^2) [(I + \alpha_d \Delta \theta)^3 - 1] T. \quad (3.4)$$

192 Based on Eq. (3.4), we conclude that the optimum geometry for maximizing the  
193 torque output is to maximize  $(r_i^2 + r_o^2)$ , assuming that the cross-section area  $A_0$  (or  
194 equivalently the material consumption) is constant. This means that the material  
195 should be distributed as far away as possible from the center of the cross-section,  
196 which justifies the use of hollow fibre over solid cross-sections. It should be noted  
197 that the above theoretically derived optimum geometry is subjected to the constraint  
198 that the hollow fibre will not buckle under the applied torque. Thus, in practice a  
199 hollow fibre with finite thickness should be used for the proposed actuation  
200 application.

201



202 **Supplementary Figures**

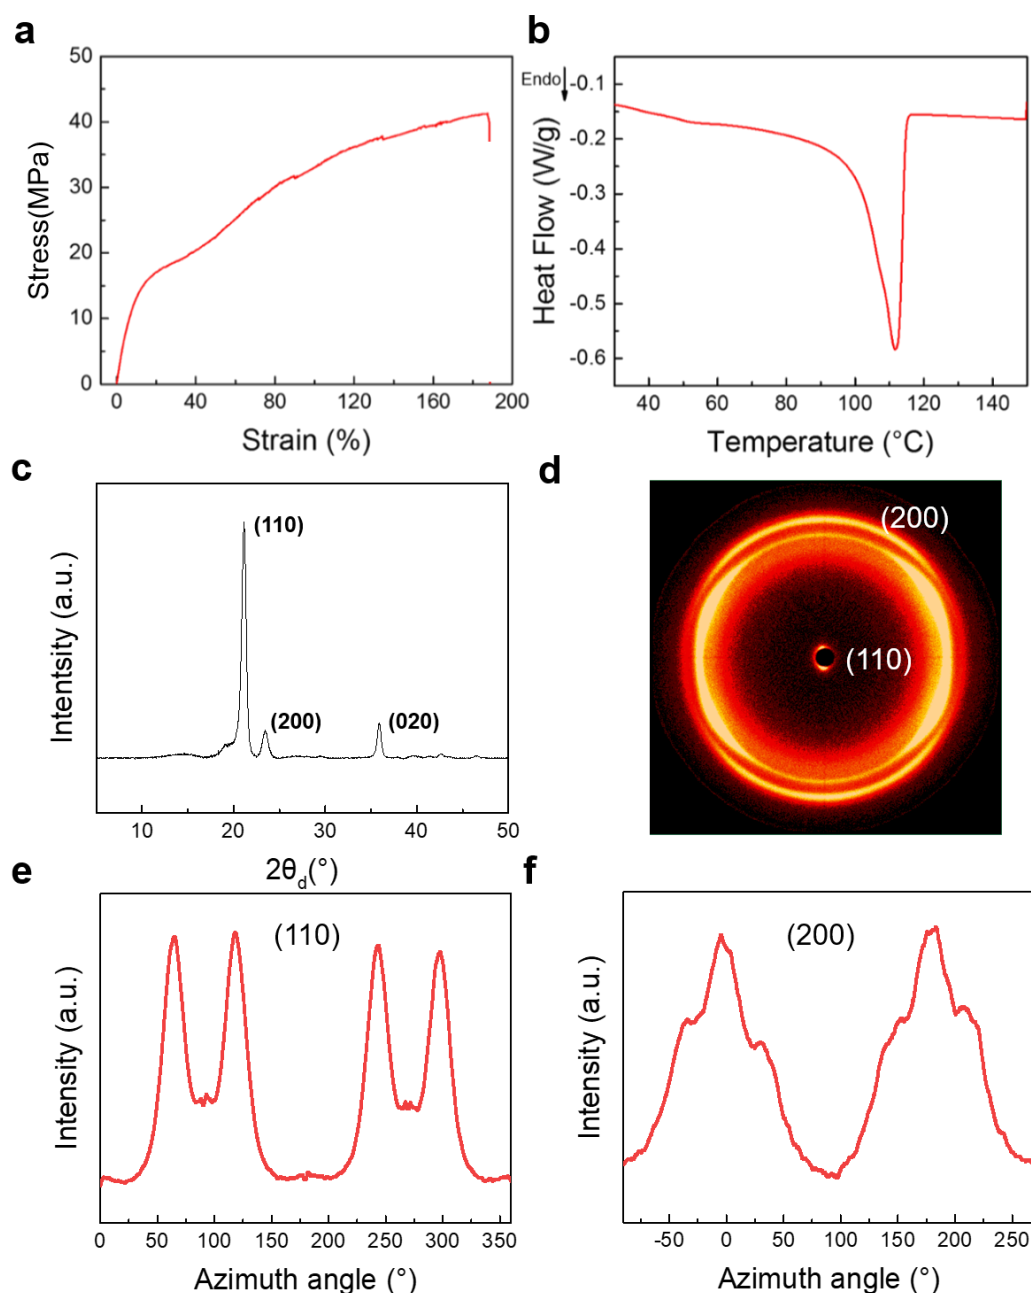

203  
 204 **Supplementary Figure 1.** (a) The stress-strain curve of the PEHF<sub>580-990</sub>. The gauge  
 205 length was 34 mm, and the extension rate was 20 mm min<sup>-1</sup>. (b) Differential scanning  
 206 calorimetry (DSC) curve of the PEHF<sub>580-990</sub> with a heating rate of 5°C/min in N<sub>2</sub>  
 207 atmosphere. The melting enthalpy ( $H_m=126.4 \text{ J g}^{-1}$ ) was obtained by integration of the  
 208 endothermic melting peak. By considering that the melting enthalpy of the 100%  
 209 crystalline polyethylene was  $H_c=287.3 \text{ J g}^{-1}$ <sup>14</sup>, we can obtain the crystallinity of  
 210 low-density polyethylene ( $\chi_c$ ) from the equation  $\chi_c=H_m/H_c=44\%$ . (c) The intensity of  
 211 diffraction peaks versus Bragg angle ( $2\theta$ ) in WAXS for PEHF<sub>580-990</sub>. (d) 2D WAXS  
 212 diffraction pattern for PEHF<sub>580-990</sub> showing anisotropic structure. (e, f) The azimuthal  
 213 curves of (110) and (200) planes in PEHF<sub>580-990</sub> were obtained from (d).

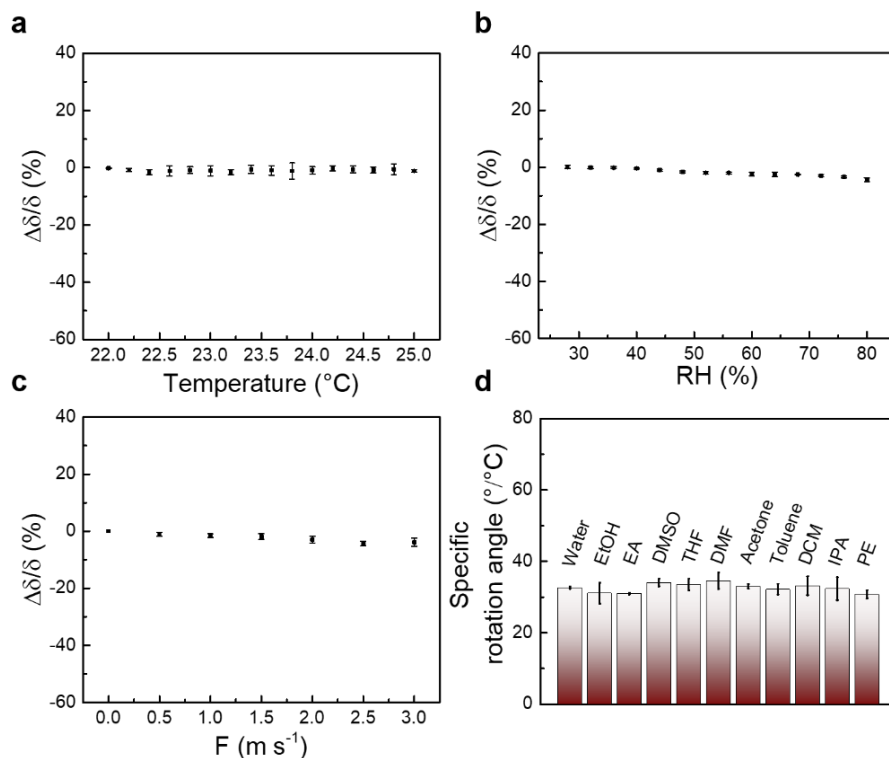

214

215 **Supplementary Figure 2.** The torsional actuation of the PEHF<sub>580-990</sub> actuator by  
 216 flowing hot water at 1.72 g s<sup>-1</sup> at different actuation conditions: (a) at different  
 217 environment temperatures, (b) at different environmental relative humidity, and (c) at  
 218 different wind speed. (d) The torsional actuation of the PEHF<sub>580-990</sub> actuator by  
 219 flowing different types of 40 °C liquid at a flow rate of 1.72 g s<sup>-1</sup>. The  $\delta$  and  $\Delta\delta$  are the  
 220 rotation angle during actuation and its change. If not specified, the room temperature  
 221 is 25 °C, the environmental relative humidity is 40%, and the water flow rate is 1.72 g  
 222 s<sup>-1</sup>. If not specified, error bars in this figure and in the following figures indicate  
 223 standard deviations. EtOH: ethanol; EA: ethyl acetate; DMSO: dimethyl sulfoxide;  
 224 THF: tetrahydrofuran; DMF: N, N-dimethylformamide; DCM: dichloromethane;  
 225 IPA: iso-propanol; PE: petroleum ether.  
 226

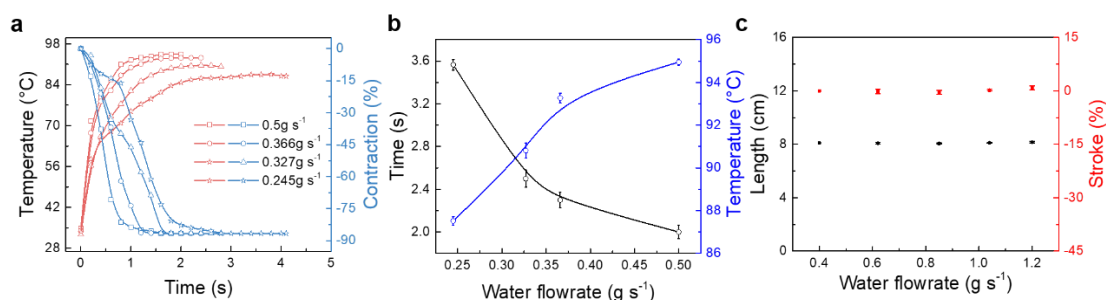

227

228 **Supplementary Figure 3.** (a) Contraction and hollow fibre surface temperature as a  
 229 function of time for a homochiral PEHF<sub>580-990</sub> actuator by flowing 95 °C water with  
 230 different flow rates. (b) Response time and hollow fibre surface temperature as a  
 231 function of water flow rate for a homochiral PEHF<sub>580-990</sub> actuator by flowing 95 °C  
 232 water. (c) Coil length and actuation stroke of the homochiral PEHF<sub>580-990</sub> actuator by

233 flowing 25 °C water at different flow rates. The spring index was 4.0, and the inserted  
 234 twist density was 200 turns m<sup>-1</sup>.

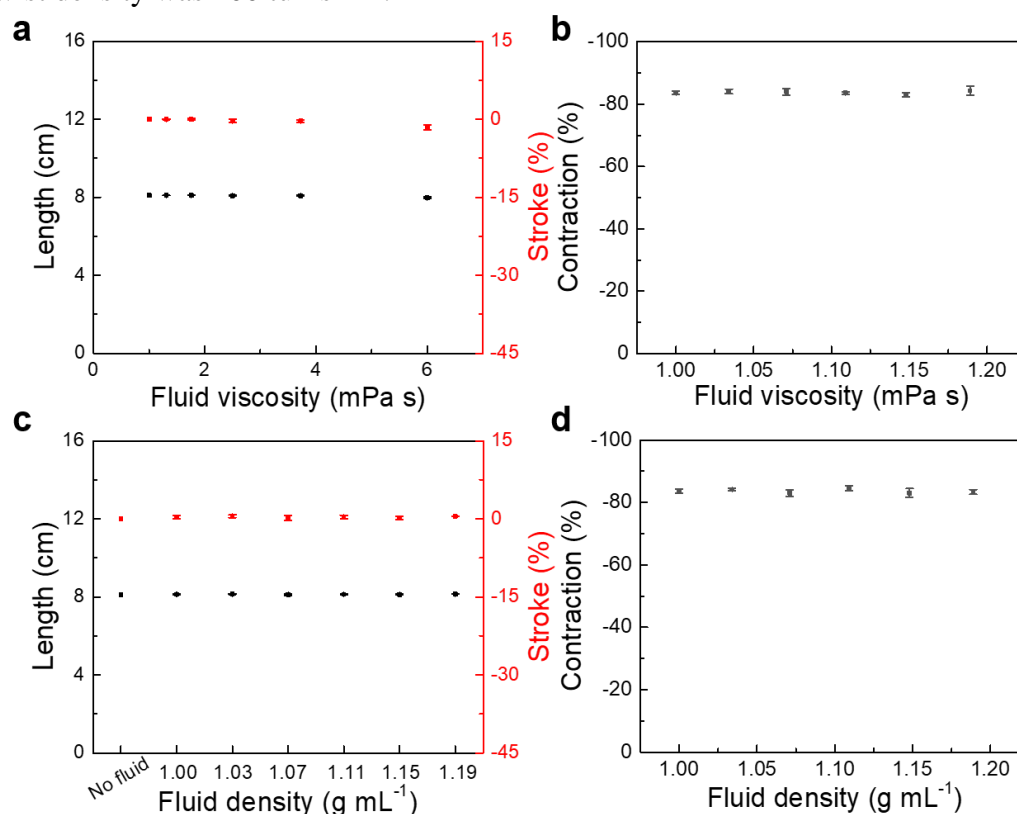

235  
 236 **Supplementary Figure 4.** (a) The initial coil length and actuation stroke of the  
 237 homochiral PEHF<sub>580-990</sub> actuator by flowing 25 °C glycerol/water solution with  
 238 different viscosity. (b) Actuation stroke of the PEHF<sub>580-990</sub> actuator by flowing 80 °C  
 239 glycerol/water solution with different viscosity. (c) The initial coil length and  
 240 actuation stroke of the PEHF<sub>580-990</sub> actuator by flowing 25 °C aqueous NaCl solution  
 241 with different densities. (d) Actuation stroke of the PEHF<sub>580-990</sub> actuator by flowing  
 242 80 °C aqueous NaCl solution with different densities. The spring index was 4.0, and  
 243 the twist density was 200 turns m<sup>-1</sup>.

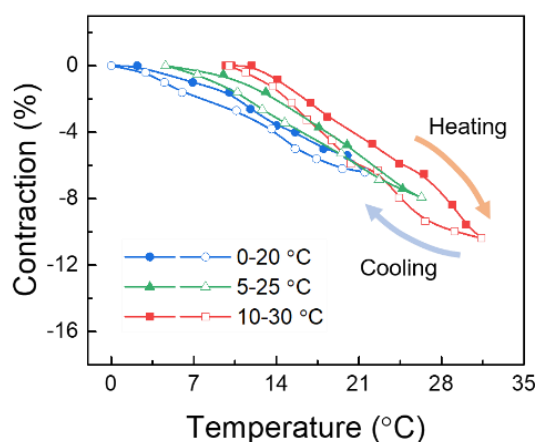

244  
 245 **Supplementary Figure 5.** The contraction as a function of temperature for  
 246 PEHF<sub>580-990</sub> actuator driven by consecutively flowing hot water and cold water with a  
 247 temperature range. The spring index was 4.0, the inserted twist density was 200 turns

248  $\text{m}^{-1}$ , and the flow rate was  $1.72 \text{ g s}^{-1}$ . The solid symbols indicate the heating process,  
 249 and the open symbols indicate the cooling process.

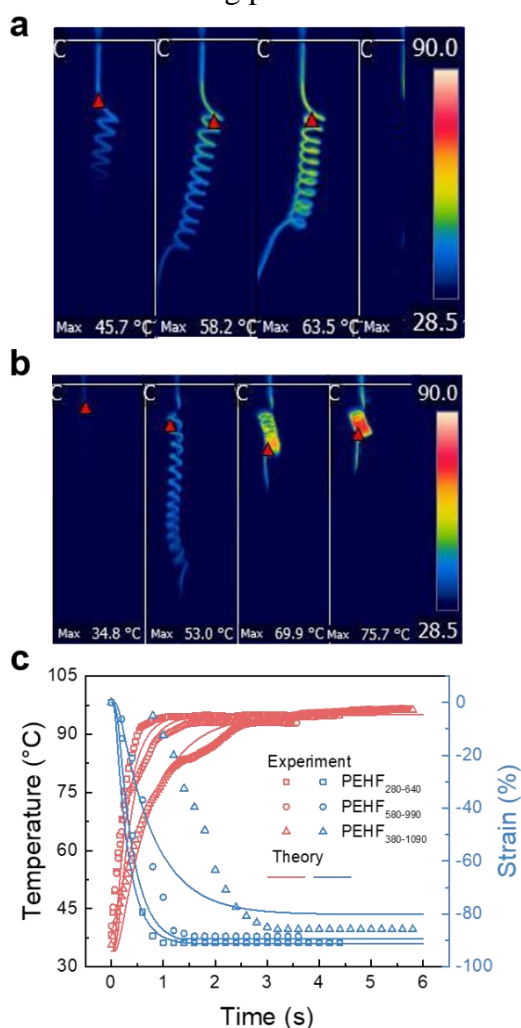

250  
 251 **Supplementary Figure 6.** (a, b) Serial infrared images of the homochiral  
 252 PEHF<sub>380-1090</sub> (a) and PEHF<sub>280-640</sub> (b) actuators by flowing 95 °C water at different time  
 253 (0 s, 0.2 s, 0.4 s, and 0.6 s). (c) Experimental results and theoretical analysis of the  
 254 actuation strain and surface temperature of the PEHF actuators as a function of time.

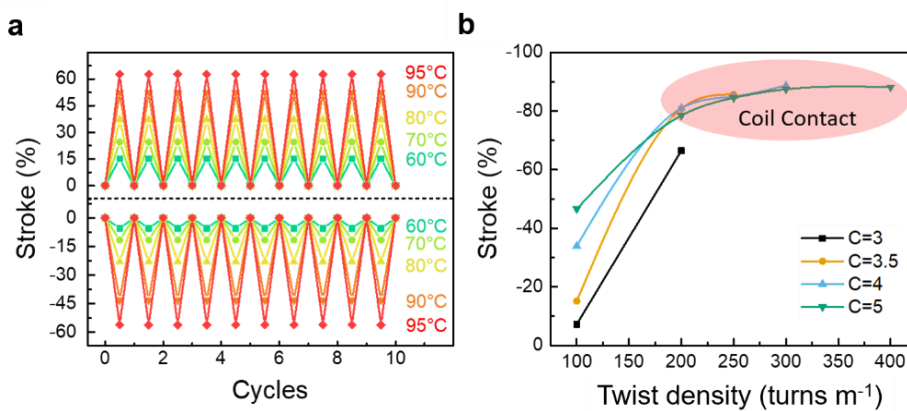

255  
 256 **Supplementary Figure 7.** (a) Maximum actuation stroke for ten consecutive  
 257 heating/cooling cycles for heterochiral and homochiral load-free PEHF<sub>580-990</sub> actuators  
 258 driven by alternatively flowing hot water and 25 °C water. (b) Maximum actuation

259 stroke as a function of twist density for load-free PEHF<sub>580-990</sub> homochiral actuators  
 260 with different spring indexes driven by 80 °C flowing water.

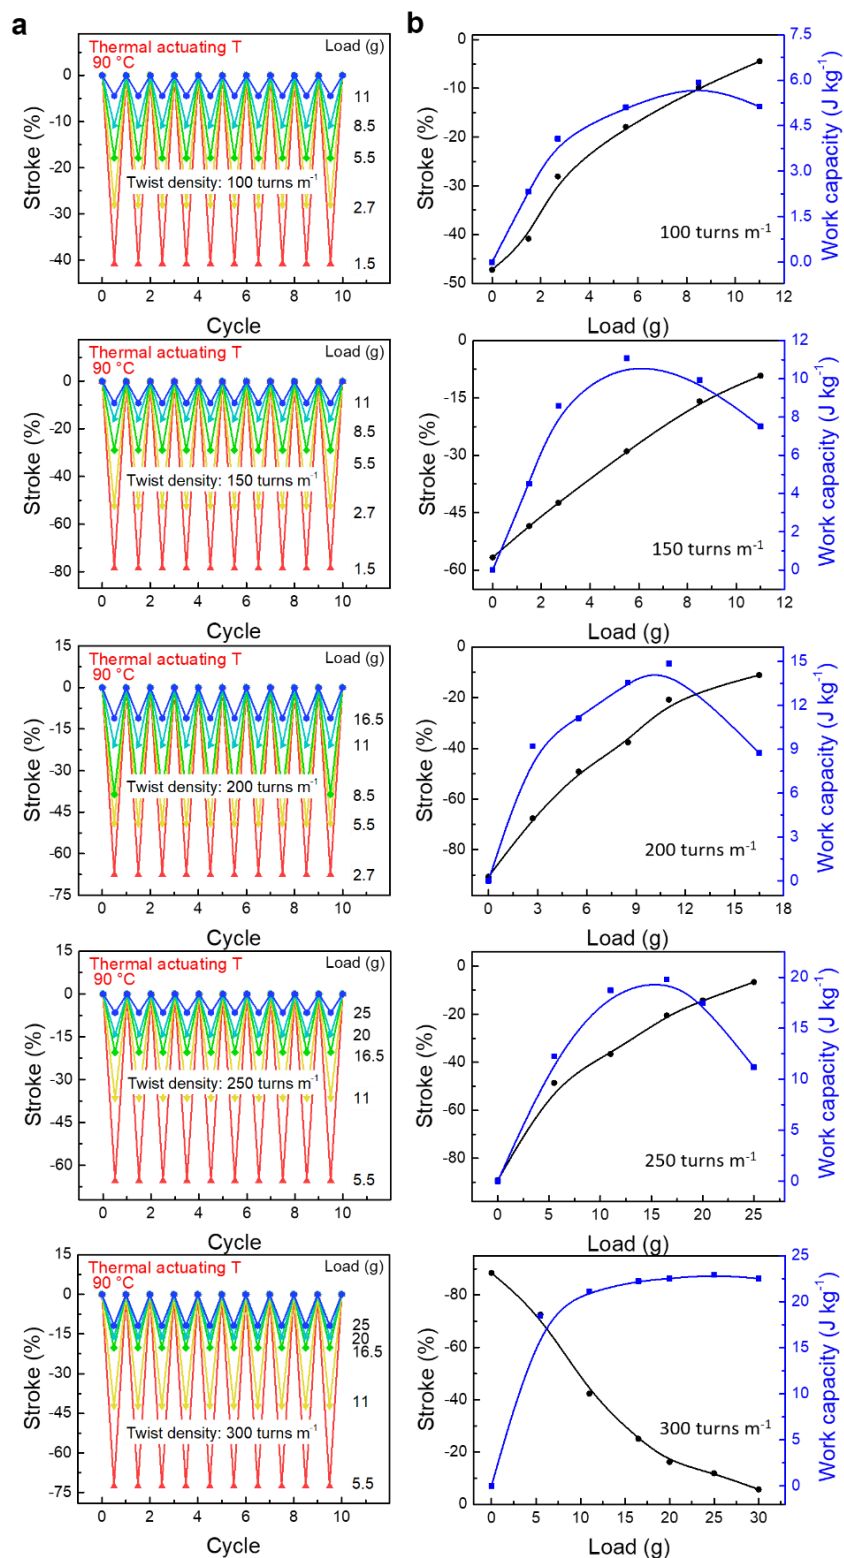

261  
 262 **Supplementary Figure 8.** (a) Maximum contraction at different mass of the load for  
 263 ten consecutive heating/cooling cycles of homochiral PEHF<sub>580-990</sub> actuators with a  
 264 spring index of 4.0 and an inserted twist of 100, 150, 200, 250 and 300 turns m<sup>-1</sup> by  
 265 alternatively flowing 90 °C and 25 °C water. (b) The actuation stroke and the work

266 capacity as a function of the mass of the applied load for the homochiral PEHF<sub>580-990</sub>  
 267 actuators with different twist densities, which were derived from graphs in (a).

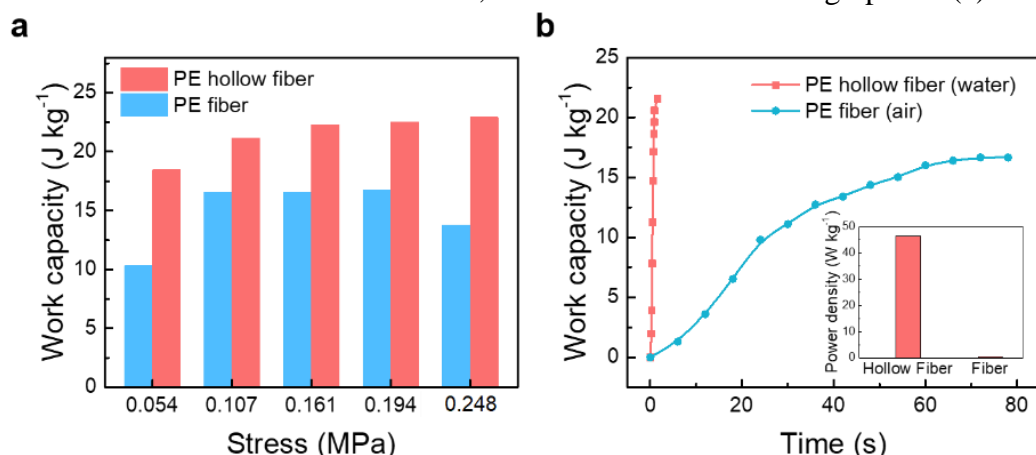

268  
 269 **Supplementary Figure 9.** (a) Comparison of the work capacity at different isobaric  
 270 stress for the homochiral PEHF<sub>580-990</sub> actuator driven by 90 °C water and for the PE  
 271 solid fibre actuator driven by 90 °C water. (b) Comparison of the time-dependence of  
 272 work capacity for the homochiral PEHF<sub>580-990</sub> actuator driven by 90 °C water and for  
 273 the PE solid fibre driven by 90 °C air at the stress of 107 kPa, and the inset was the  
 274 comparison of power density. The twist density was 300 turns m<sup>-1</sup>, and the spring  
 275 index was 4.0. The isobaric stress was calculated as the weight of the load divided by  
 276 the cross-sectional area of sheath of the hollow fibre.

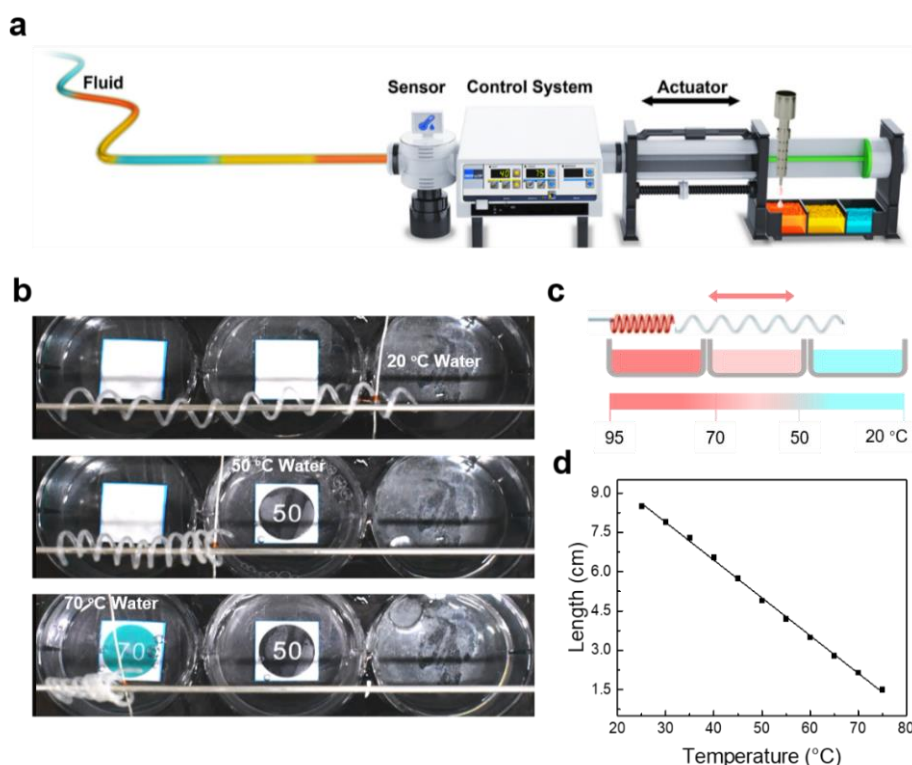

277  
 278 **Supplementary Figure 10.** (a) Schematic diagram of a conventional microfluidic  
 279 manipulation system containing liquid sensing, transporting and actuating devices.  
 280 Optical images (b) and schematic illustration (c) of the contractile hollow fibre  
 281 actuators used for sensing the liquid temperature and sorting the liquid into the

282 desired vessels. (d) The length of the hollow fibre actuators as a function of the  
283 temperature of the flowing water for the homochiral PEHF<sub>580-990</sub> actuators.

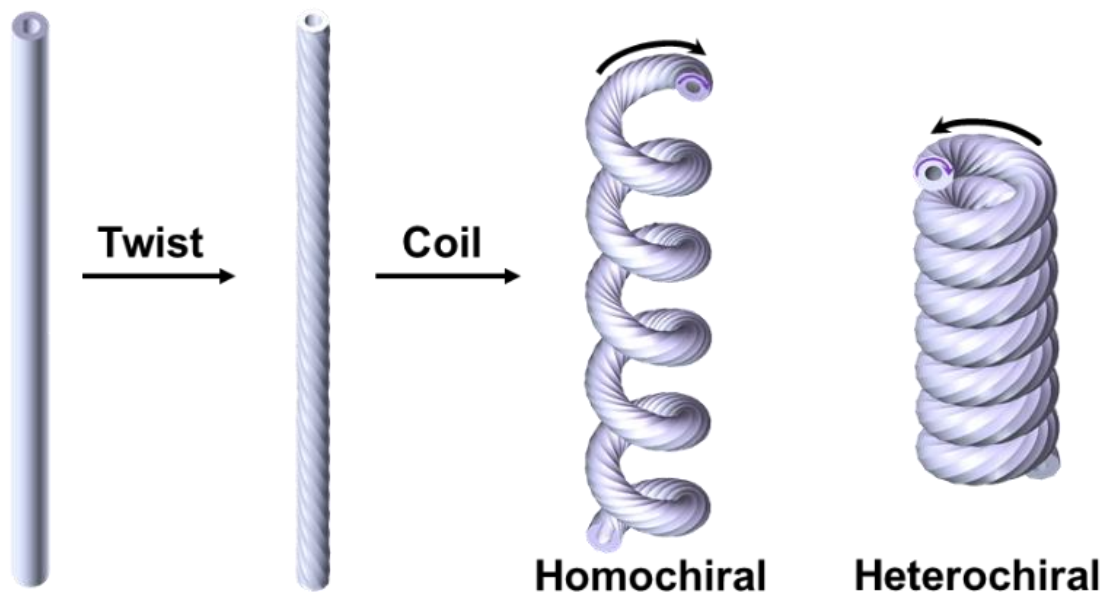

284  
285 **Supplementary Figure 11** Schematic of the twisted and coiled hollow-fibre  
286 actuators  
287

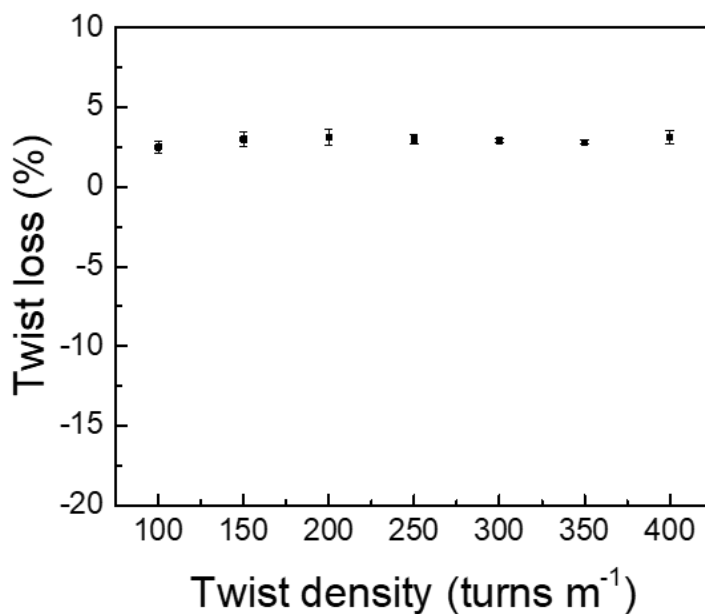

288  
289 **Supplementary Figure 12.** The twist loss of the hollow fibre after twist insertion,  
290 thermal annealing with both-end tethered at 108 °C for 1h, and cooling down to room  
291 temperature and removing the tethering.  
292



293 **Supplementary Tables:**

294 **Supplementary Table 1.** Response time and actuation parameters of the torsional

295 PEHF actuators in this work.

| Materials               | Twist density<br>(turns m <sup>-1</sup> ) | $\Delta\theta$<br>(°C) | Flowrate<br>(g s <sup>-1</sup> ) | Response time<br>(s) |
|-------------------------|-------------------------------------------|------------------------|----------------------------------|----------------------|
| PEHF <sub>580-990</sub> | 100                                       | 70                     | 0.5                              | 2.5                  |
| PEHF <sub>580-990</sub> | 200                                       | 70                     | 0.5                              | 2.1                  |
| PEHF <sub>580-990</sub> | 300                                       | 70                     | 0.5                              | 1.9                  |
| PEHF <sub>580-990</sub> | 400                                       | 70                     | 0.5                              | 1.7                  |
| PEHF <sub>580-990</sub> | 400                                       | 55                     | 0.5                              | 1.8                  |
| PEHF <sub>580-990</sub> | 400                                       | 45                     | 0.366                            | 2.7                  |
| PEHF <sub>580-990</sub> | 400                                       | 35                     | 0.327                            | 1.1                  |
| PEHF <sub>580-990</sub> | 400                                       | 5                      | 1.72                             | 1.0                  |

296

297 **Supplementary Table 2.** Response time and actuation parameters of the tensile PEHF

298 actuators in this work.

| Materials                | Twist density<br>(turns m <sup>-1</sup> ) | $\Delta\theta$<br>(°C) | Flowrate<br>(g s <sup>-1</sup> ) | Response time<br>(s) |
|--------------------------|-------------------------------------------|------------------------|----------------------------------|----------------------|
| PEHF <sub>580-990</sub>  | 200                                       | 35                     | 1.72                             | 2.5                  |
| PEHF <sub>580-990</sub>  | 200                                       | 45                     | 1.72                             | 1.6                  |
| PEHF <sub>580-990</sub>  | 200                                       | 55                     | 1.72                             | 1.4                  |
| PEHF <sub>580-990</sub>  | 200                                       | 70                     | 1.72                             | 0.88                 |
| PEHF <sub>580-990</sub>  | 200                                       | 70                     | 0.5                              | 1.4                  |
| PEHF <sub>580-990</sub>  | 200                                       | 70                     | 0.366                            | 1.6                  |
| PEHF <sub>580-990</sub>  | 200                                       | 70                     | 0.327                            | 1.7                  |
| PEHF <sub>580-990</sub>  | 200                                       | 70                     | 0.245                            | 2.8                  |
| PEHF <sub>280-640</sub>  | 310                                       | 70                     | 0.366                            | 1                    |
| PEHF <sub>380-1090</sub> | 182                                       | 70                     | 0.366                            | 3.0                  |

299

300



301 **Supplementary Table 3.** Resolution and the coil parameters of the homochiral PEHF  
 302 hollow fibre actuators in this work.

| Fibre Length<br>( $l$ , mm) | Coil Length<br>( $L$ , mm) | Number of<br>Turns ( $N$ ) | Twist density<br>( $T$ , turns $\text{mm}^{-1}$ ) | Resolution<br>( $l^2\Delta T/NL$ , $10^{-3}$ ) |
|-----------------------------|----------------------------|----------------------------|---------------------------------------------------|------------------------------------------------|
| 200                         | 105                        | 11                         | 0.30                                              | -3.0%                                          |
| 200                         | 105                        | 11                         | 0.25                                              | -2.0%                                          |
| 200                         | 105                        | 11                         | 0.20                                              | -1.3%                                          |
| 200                         | 105                        | 11                         | 0.15                                              | -0.78%                                         |
| 200                         | 105                        | 11                         | 0.10                                              | -0.43%                                         |
| 200                         | 115                        | 12                         | 0.30                                              | -2.5%                                          |
| 200                         | 115                        | 12                         | 0.25                                              | -1.7%                                          |
| 200                         | 115                        | 12                         | 0.20                                              | -1.1%                                          |
| 200                         | 115                        | 12                         | 0.15                                              | -0.66%                                         |
| 200                         | 115                        | 12                         | 0.10                                              | -0.36%                                         |
| 200                         | 130                        | 15                         | 0.25                                              | -1.2%                                          |
| 200                         | 130                        | 15                         | 0.20                                              | -0.78%                                         |
| 200                         | 130                        | 15                         | 0.10                                              | -0.26%                                         |
| 200                         | 145                        | 18                         | 0.20                                              | -0.58%                                         |
| 200                         | 145                        | 18                         | 0.10                                              | -0.19%                                         |

303

304 **References:**

- 305 1. Gururajan G. & Ogale A. A. Real-time crystalline orientation measurements during low-density  
306 polyethylene blown film extrusion using wide-angle X-ray diffraction. *Polym. Eng. Sci.* **52**,  
307 1532-1536 (2012).
- 308 2. Dees J. R. & Spruiell J. E. Structure development during melt spinning of linear polyethylene  
309 fibers. *J Appl. Polym. Sci.* **18**, 1053-1078 (1974).
- 310 3. Choy C., Chen F. & Young K. Negative thermal expansion in oriented crystalline polymers. *J.*  
311 *Polym. Sci. Polym. Phys. Ed.*, **19**, 335-352 (1981).
- 312 4. Stein R. S. The X-ray diffraction, birefringence, and infrared dichroism of stretched polyethylene.  
313 II. Generalized uniaxial crystal orientation. *J Polym. Sci.* **31**, 327-334 (1958).
- 314 5. Jiang P., Li X., Xu R. & Zhang F. Heat extraction of novel underground well pattern systems for  
315 geothermal energy exploitation. *Renew. Energ.* **90**, 83-94 (2016).
- 316 6. Olga 7 user manual. (2010).
- 317 7. Allan J., Pinder H. & Dehouche Z. Enhancing the thermal conductivity of ethylene-vinyl acetate  
318 (EVA) in a photovoltaic thermal collector. *AIP Advances* **6**, 035011 (2016).
- 319 8. Zhang Z. & Lafleur P. G. Investigation of LDPE blown film instability induced by air cooling.  
320 *Polym. Eng. Sci.* **48**, 1504-1510 (2008).
- 321 9. Hahn D. W. & Özisik M. N. Heat conduction. John Wiley & Sons (2012).
- 322 10. Haines C. S., et al. Artificial Muscles from Fishing Line and Sewing Thread. *Science* **343**,  
323 868-872 (2014).
- 324 11. Aziz S, Naficy S, Foroughi J, Brown H. R. & Spinks G. M. Controlled and scalable torsional  
325 actuation of twisted nylon 6 fiber. *J. Polym. Sci., Part B: Polym. Phys.* **54**, 1278-1286 (2016).
- 326 12. Leng X, et al. Tuning the reversibility of hair artificial muscles by disulfide cross-linking for  
327 sensors, switches, and soft robotics. *Mater. Horiz.* **8**, 1538-1546 (2021).
- 328 13. Budynas R. G. & Nisbett J. K., *Shigley's Mechanical Engineering Design* (McGraw-Hill, New  
329 York, 2008).
- 330 14. Kong J., Fan X., Xie Y. & Qiao W. Study on molecular chain heterogeneity of linear low-density  
331 polyethylene by cross-fractionation of temperature rising elution fractionation and successive  
332 self-nucleation/annealing thermal fractionation. *J. Appl. Polym. Sci.* **94**, 1710-1718 (2004).
